# Supplementary material for: Antiallergic Phorbol Ester from the Seeds of Aquilaria malaccensis
Source: MDPI journal article supplement (doi:10.3390/ijms17030398), 2016-03-21
Supplement: s1 [file s1]

# Supplementary Materials: Antiallergic Phorbol Ester from the Seeds of *Aquilaria Malaccensis*

Michal Korinek, Vitthal D. Wagh, I-Wen Lo, Yu-Ming Hsu, Hsue-Yin Hsu, Tsong-Long Hwang, Yang-Chang Wu, Yuan-Bin Cheng, Bing-Hung Chen and Fang-Rong Chang

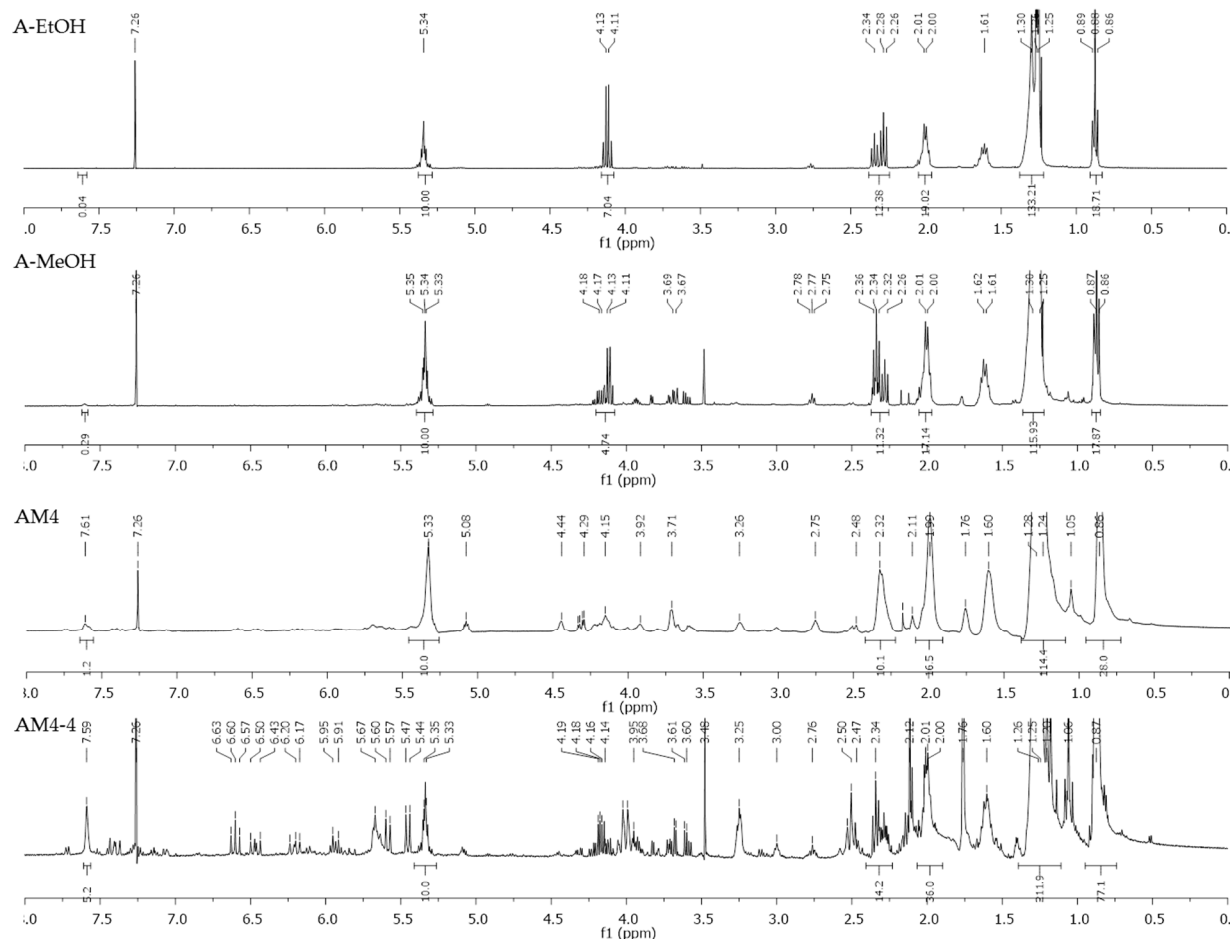

**Figure S1.**  $^1\text{H}$  NMR spectra of A-EtOH, A-MeOH, AM4 and AM4-4 in  $\text{CDCl}_3$ , 400 MHz. The  $^1\text{H}$  NMR comparison of consequent fractions guided by antiallergic activity. The typical signals for phorbol diterpenes ( $\delta_{\text{H}}$  7.5, H-1;  $\delta_{\text{H}}$  5.6, H-7) increased with purification in following manner: ethanolic extract (A-EtOH) < methanolic partition layer (A-MeOH) < 4th fraction of the methanolic layer (AM4) < 4th fraction of AM4 (AM4-4).

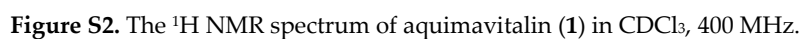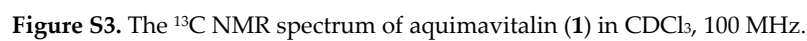

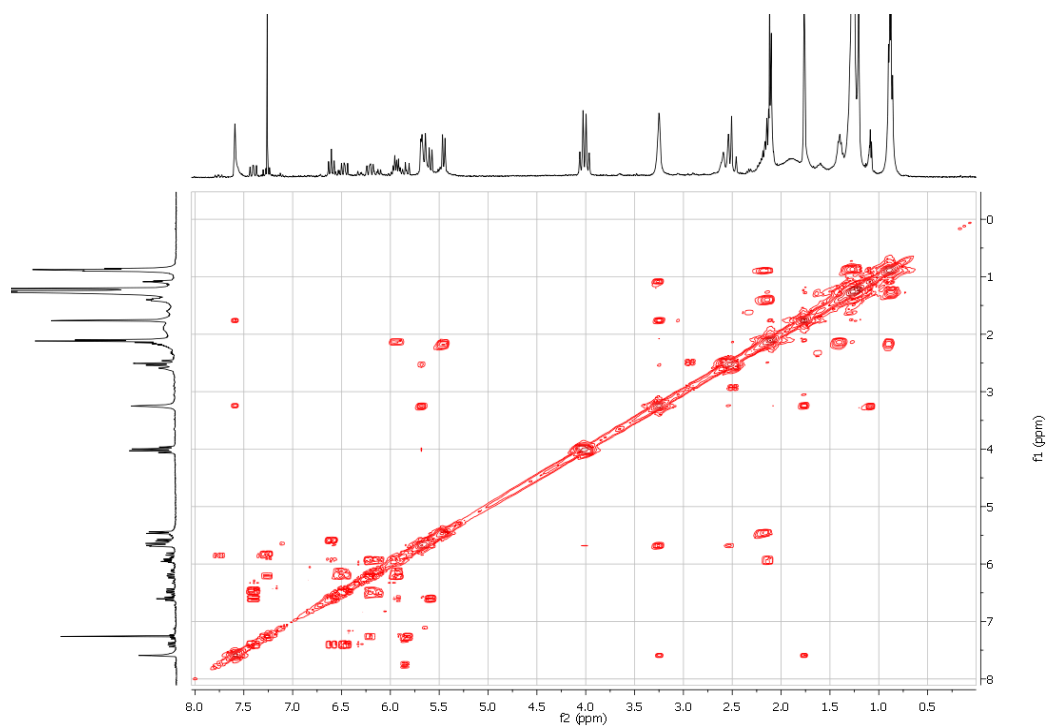

**Figure S4.**  $^1\text{H}$ – $^1\text{H}$  correlation spectroscopy (COSY) spectrum of aquimavitalin (**1**) in  $\text{CDCl}_3$ .

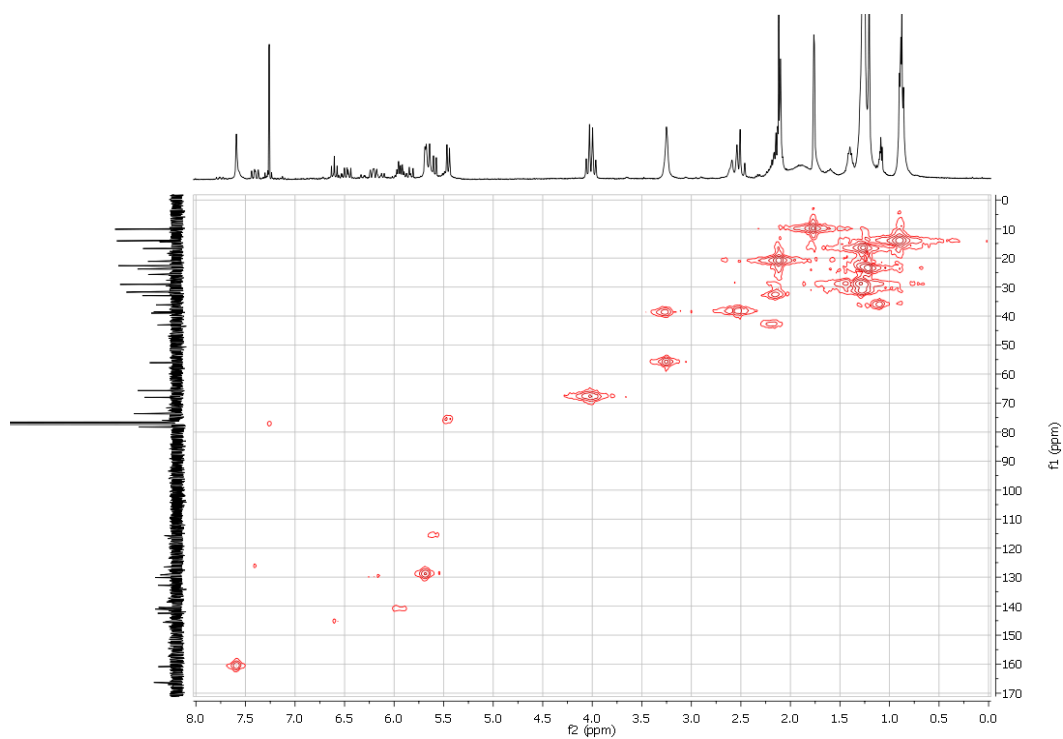

**Figure S5.** HMQC spectrum of aquimavitalin (**1**) in  $\text{CDCl}_3$ .

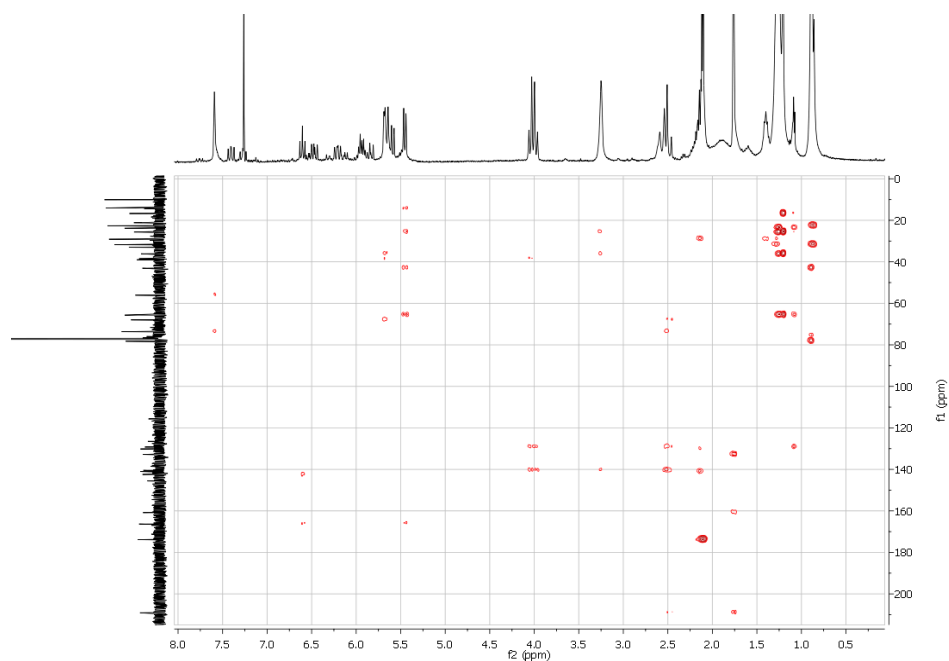

**Figure S6.** Heteronuclear multiple bond correlation spectroscopy (HMBC) spectrum of aquimavitalin (1) in CDCl<sub>3</sub>.

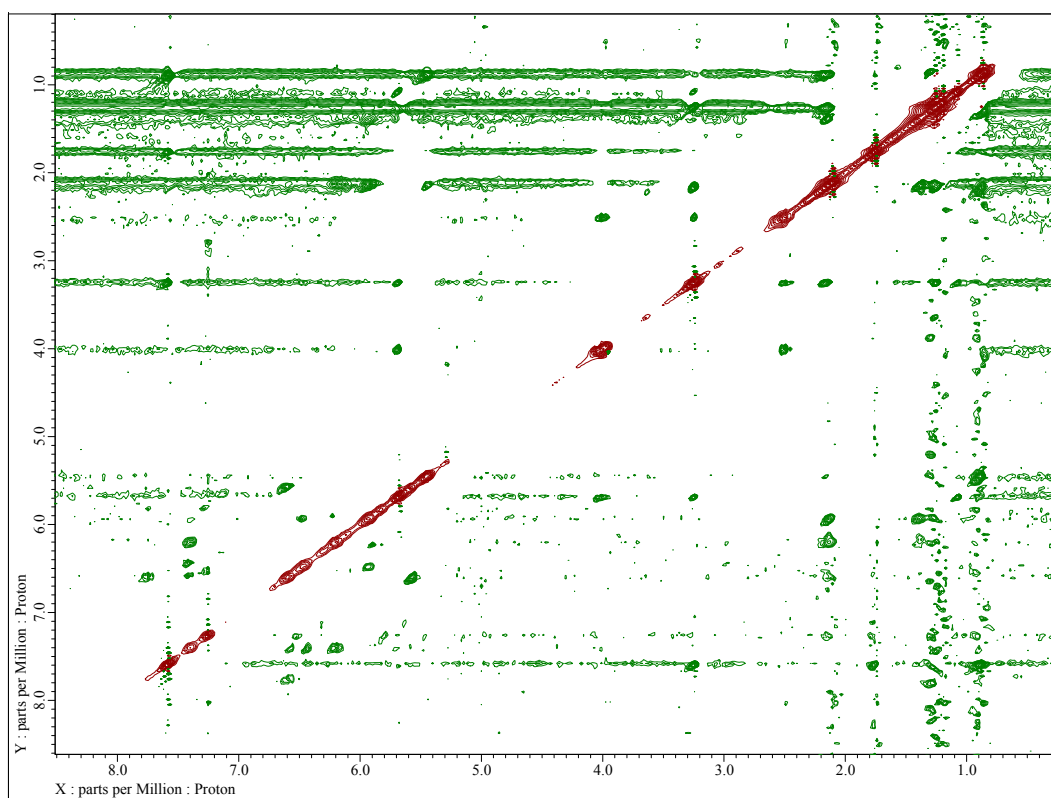

**Figure S7.** Nuclear overhauser effect spectroscopy (NOESY) spectrum of aquimavitalin (1) in CDCl<sub>3</sub>.

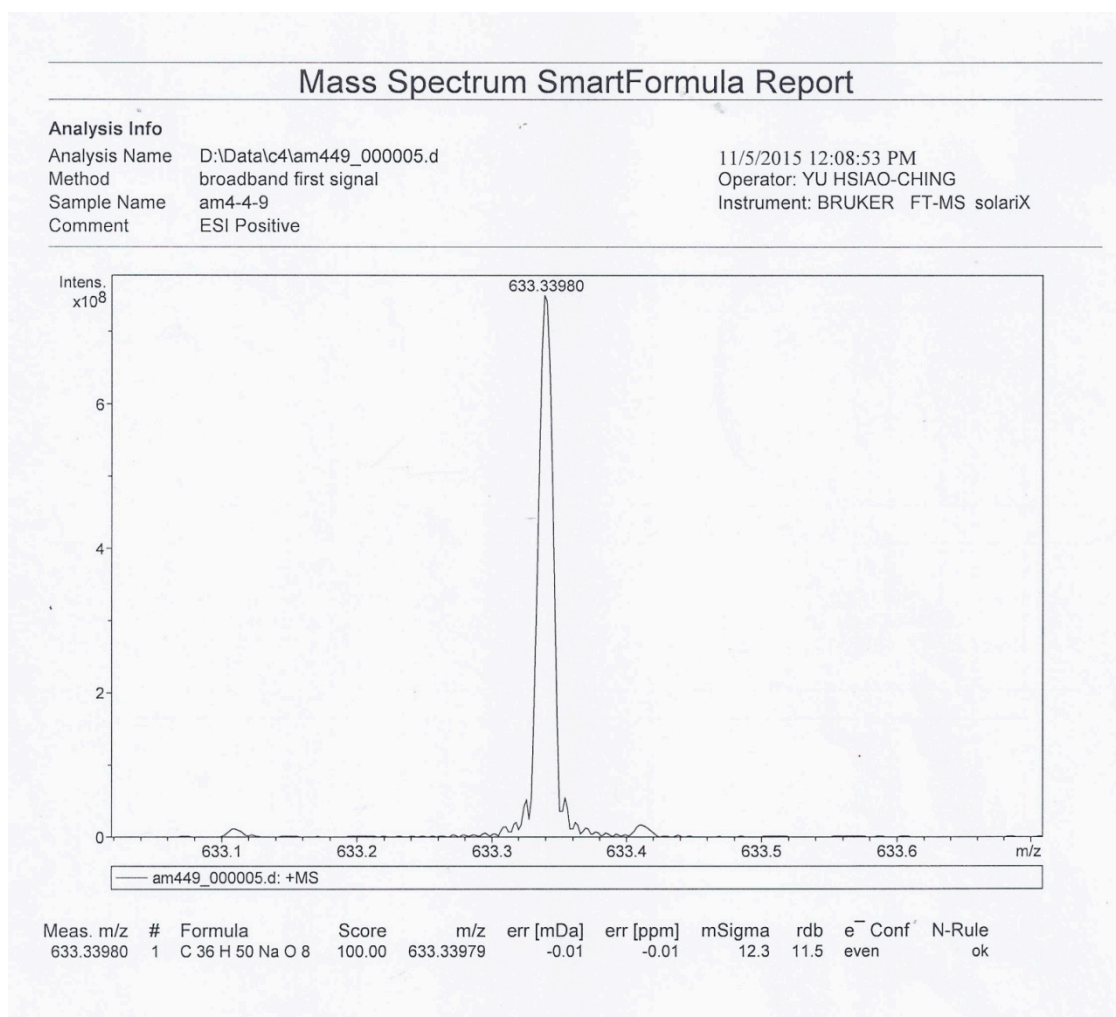

**Figure S8.** High-resolution electrospray ionization mass spectrometry (HR-ESIMS) spectrum of aquimavitalin (1).
